# Supplementary material
Source: Springer Nature journal article supplement (https://www.springermedizin.de/resource/supplementary/12913_2008_889_MOESM3_ESM.pdf/9536220)

## Products & Tools

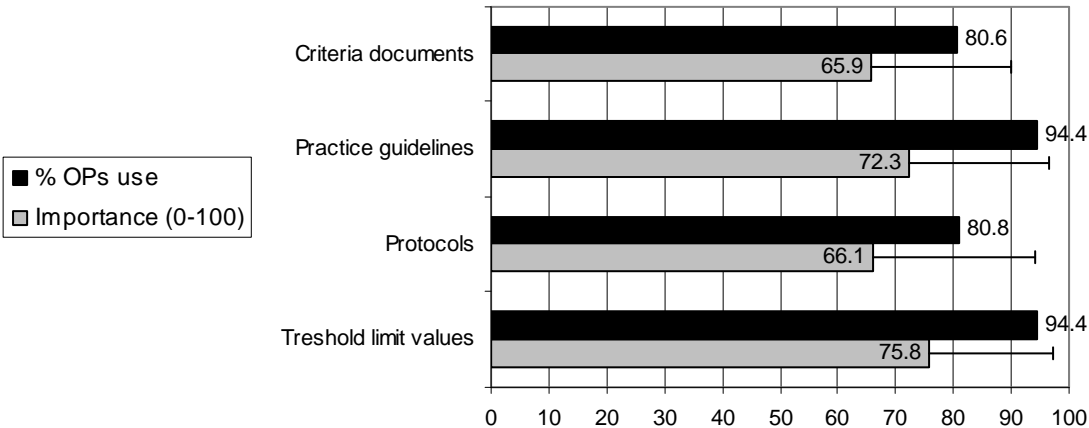

Supplement: MOESM3 [file 9536220]
